# Supplementary material
Source: PubMed Central journal article supplement (PMC3458326)
Supplement: 1207491109_pnas.1207491109_SI.pdf [file 1207491109_pnas.1207491109_SI.pdf]

# Supporting Information

Bontognali et al. 10.1073/pnas.1207491109

## SI Text

**SI Discussion.** NanoSIMS  $\delta^{34}\text{S}$  analysis of the extracted kerogen yielded data that overlap with but are, on average, more negative than values obtained by in situ measurements performed directly on the stromatolite thin sections (Fig. 3). Given the challenges associated with the statistics of small numbers, it is not simple to assess whether the characteristics of these distributions are meaningfully different, or would instead converge given more observations of other regions of the stromatolite. If the distributions are indeed real, several factors might explain this difference:

1. The portion of stromatolite sample used for extracting kerogen via HF/HCl dissolution of the rock matrix may not be representative of the regions analyzed in situ.
2. Some S-bearing molecules (e.g., disulfides and polysulfides) may be lost during the HF/HCl demineralization procedure. However, this process is not expected to cause large isotopic fractionation of the remaining organic sulfur (1).
3. A fraction of the signal for in situ measurements may come from elemental sulfur that formed by recent oxidation with atmospheric oxygen. Such elemental sulfur would be lost during the HF/HCl demineralization procedure used for isolation of kerogen. Few studies have determined the effect of oxidation processes on the isotopic composition of organic sulfur. However, existing data indicate that only limited isotopic fractionation occurs during oxidation, leaving the  $\delta^{34}\text{S}$  values of the remaining sulfur basically unaltered (2). Moreover, abiotic oxidation processes typically favor  $^{32}\text{S}$  over  $^{34}\text{S}$ . Thus, measurements of extracted kerogen, which do not include the oxidized S, should yield, on average, more positive  $\delta^{34}\text{S}$  values relative to the in situ measurements. Our data indicate the opposite trend.
4. The in situ measurements performed on cherts may be subtly influenced by a matrix effect. It is difficult to categorically exclude this hypothesis; however, a matrix effect could be expected to preferentially increase counts of the lighter isotope (3). Comparison of data for kerogens and in situ analyses indicate the opposite trend. Also, no correlation exists between  $\delta^{34}\text{S}$  and Si/C ratios, nor between  $\delta^{34}\text{S}$  and O/C ratios (where Si/C and O/C are proxies for the amount of chert matrix relative to the amount of organic material), suggesting the absence of a large matrix effect.
5. Mechanical mixing during the extraction process may homogenize the organic material. This could explain the slightly smaller range of  $\delta^{34}\text{S}$  values in the extracted kerogen and—in conjunction with point 1—potentially the difference in average values.
6. A fraction of the signal from in situ measurements may derive from carbonate minerals containing traces of sulfate. We do not favor this hypothesis because explicit measurements of coexisting carbonate minerals in the thin section yielded a S ion count two orders of magnitude lower than those from organic regions. This comparison also excludes a possible source of background contamination.
7. NanoSIMS measurements are feasible only on organic particles with minimum dimensions of  $3 \times 3 \mu\text{m}$ . Smaller particles, which represent an important fraction of the bulk extracted organic material but were not analyzed in situ, could have lower average  $\delta^{34}\text{S}$  values.

The precise influence of these factors in the resulting differences between the  $\delta^{34}\text{S}$  distributions remains undetermined. However, the results from both in situ measurements and ex-

tracted kerogen, even when considered separately, point to the same conclusion: The process of organic matter sulfurization in pore waters was influenced by sulfur-metabolizing microbes.

**SI Methods. Sample preparation for in situ measurements.** Stromatolite samples investigated in this study were collected from an outcrop located on southern Anchor Ridge in the northern Pilbara Craton, Western Australia. The exact location of the outcrop, a detailed petrographic description of the sample, and its stratigraphic position are described in detail by ref. 4. Ultrapolished thin sections for NanoSIMS analysis were produced from the sample pictured in Allwood et al.'s figure 1 (4). Thin sections were coated with 30 nm of Au to provide optimal electrical conductivity. To avoid contamination, immersion oil was never used during preliminary investigation by optical microscopy and samples were mounted to the glass without complete impregnation into Epoxy. Samples were cleaned by ultrasonication in high-purity ethanol prior to application of the gold coating.

**Extraction of bulk organic matter by HF/HCl demineralization.** Samples were first crushed and then demineralized by acidification in HCl followed by HF. About 30 g of sample was placed into aqua regia and solvent-cleaned Teflon tubes (approximately 10 g per tube). Acids were then added to the samples and allowed to react as follows: 6N DCM-extracted HCl for 24–48 h (to remove carbonates) and 48% HF for at least 72 h (to dissolve silicates). In this latter step, we used a modification of the procedure described in ref. 5 whereby we added solid boric acid to the HF digestion to inhibit formation of fluorides. The samples were then washed several times in DCM-extracted HCl followed by DCM-extracted water. The resulting powders were re-extracted and dried. The resulting kerogen had a bulk carbon isotopic composition of  $-27.8\text{‰}$  VPDB.

For NanoSIMS analysis, the extracted organic matter was mounted on a steel holder by pressing the powder into a layer of indium metal. Due to the very limited amount of kerogen, it was not possible to analyze the extracted organic material by elemental analyzer–isotope ratio mass spectrometry (EA-IRMS).

**Kerogen standards.** In addition to the organic matter extracted from the stromatolite sample, four kerogens were used as standards for this study, including: type III-S (Miocene Monterey Formation) (6), type IIS (Cretaceous Ghareb limestone from Jordan) (7), type III (Paleocene lignite from Calvert Bluff Formation of the Wilcox Group in Texas) (7), and protokerogen from the Santa Barbara Basin. The method used for isolating the kerogens is described in ref. 7.

The bulk  $\delta^{34}\text{S}$  composition of the kerogens was determined at the University of California, Riverside, CA using standard elemental analyzer–isotope ratio mass spectrometer (EA-IRMS) method (8, 9).

For IMS 7f and NanoSIMS analysis, the kerogen standards were mounted on steel holders by pressing the powders into a layer of indium.

**IMS 7f-GEO analysis.** The extracted kerogens were investigated with a Cameca 7f-GEO magnetic sector secondary ion mass spectrometer at the Center for Microanalysis of the California Institute of Technology, Pasadena, CA. This ion probe provides lower spatial resolution but higher measurement precision when compared to NanoSIMS. Analytical conditions for session 1 (Table S2) were as follows: presputtering,  $10 \times 10 \mu\text{m}$ ; data collection,

10 × 10 μm; all masses were measured with Faraday cup (FC) detectors; beam current was approximately 6.5 nA. Analytical conditions for sessions 2 and 3 (Table S2) were as follows: presputtering, 10 × 10 μm; data collection, focused beam; all masses were measured with electron multiplier (EM) detectors, beam current was approximately 0.2 nA. Analytical conditions for session 4 (Table S3) were as follows: presputtering, 50 × 50 μm; data collection, 50 × 50 μm; <sup>32</sup>S was measured with FC detector, <sup>33</sup>S was measured with EM detector, and <sup>34</sup>S was measured with EM detector; beam current was approximately 3 nA. Analytical conditions for session 5 (Table S3) were as follows: presputtering, 5 × 5 μm; data collection, 5 × 5 μm; <sup>32</sup>S was measured with FC detector, <sup>33</sup>S with EM detector, and <sup>34</sup>S with EM detector; beam current was approximately 0.2 nA. Instrument mass fractionation during each session was corrected by calibration to the kerogen standard from the Monterey Formation. Δ<sup>33</sup>S measurements are based on the assumption that organic sulfur in kerogens younger than 2.4 billion years (Ga) (the time when anomalous Δ<sup>33</sup>S disappear from sedimentary sulfide likely due to the oxygenation of the atmosphere) has a Δ<sup>33</sup>S = 0 (10). This assumption was not independently tested by measuring Δ<sup>33</sup>S of the kerogens with a bulk method.

**NanoSIMS analysis.** Isotope ratio measurements were performed using the Cameca NanoSIMS 50L at the Center for Microanalysis of the California Institute of Technology, Pasadena, CA. Analyses of organic material were carried out by rastering an approximately 20 nA Cs<sup>+</sup> ion beam across presputtered 3 × 3 μm regions of the samples. The secondary ions species <sup>12</sup>C<sup>-</sup>, <sup>16</sup>O<sup>-</sup>, <sup>28</sup>Si<sup>-</sup>, <sup>32</sup>S<sup>-</sup>, and <sup>34</sup>S<sup>-</sup> were recorded simultaneously by electron multipliers. The regions of interest were located using the NanoSIMS charge coupled device camera and real-time <sup>12</sup>C and <sup>32</sup>S ion imaging. Data were collected in 16 analytical sessions over a period of one year. The results of each session are presented in Table S4 and Fig. S4 in the original sequence of the measurements. All analyses of the samples were interspersed with multi-

ple measurements of a standard. Instrument mass fractionation during each session was corrected by calibration to the kerogen standard from the Monterey Formation. No systematic drift in the recorded <sup>34</sup>S/<sup>32</sup>S ion-current ratios due to detector ageing was observed when comparing measurements of the standards at the beginning and end of each session. Thus, no drift correction has been applied. Incomplete coverage corrections were not necessary because the analyses were performed exclusively on regions in which organic material filled the 3 × 3 μm raster area. Raw <sup>34</sup>S/<sup>32</sup>S ratios were corrected for electron multiplier dead-time, and corrected for quasi-simultaneous arrivals (QSA) using the relationship  $R_{\text{measured}} = R_{\text{true}} \cdot (1 + \beta \cdot K)$ ; with  $\beta = 0.5$  and  $K = {}^{32}\text{S}^- / \text{Cs}^+$  (11, 12). Because questions persist concerning the general validity of this formula (11, 12), we recalculated our data both without QSA correction and by applying the QSA correction with  $\beta = 0.69$  [i.e., the value obtained experimentally through the measurement of sulfide minerals (11)]. By using the QSA correction with  $\beta = 0.5$ , the δ<sup>34</sup>S values measured from the stromatolites (session 1 to session 13 in Table S4) range from 16.6‰ to 40.6‰. If we do not apply the QSA correction, δ<sup>34</sup>S range from 19.9‰ to 36.6‰, and, on average, they are 3.4‰ more negative than the values corrected with  $\beta = 0.5$ . By applying the QSA correction with  $\beta = 0.69$ , δ<sup>34</sup>S values range from 15.4‰ to 42.2‰ and are, on average, 1.3‰ more positive than the values corrected with  $\beta = 0.5$ . Such differences are small relative to the total range of measured δ<sup>34</sup>S values (>56‰ in all three cases) and so do not influence our interpretation of the data. In Table S4, data are reported both with and without QSA correction. Measurements performed on the four kerogens of known isotopic composition indicate that NanoSIMS data match slightly better those obtained with IMS 7f-GEO if no QSA correction is applied. Thus, Fig. 1 and Fig. 3 were based on data without QSA correction. No correlation between δ<sup>34</sup>S and Si/C, δ<sup>34</sup>S and O/C, or δ<sup>34</sup>S and <sup>32</sup>S count rate were observed during any of the in situ measurements. Such correlations could be diagnostic of analytical artifacts due to the presence of the mineral matrix.

- Amrani A, Lewan MD, Aizenshtat Z (2005) Stable sulfur isotope partitioning during simulated petroleum formation as determined by hydrous pyrolysis of Ghareb Limestone, Israel. *Geochim Cosmochim Acta* 69:5317–5331.
- Fry B, Ruf W, Gest H, Hayes JM (1988) Sulfur isotope effects associated with oxidation of sulfide by O<sub>2</sub> in aqueous solution. *Isot Geosci* 73:205–210.
- Riciputi LR, Paterson BA, Ripperdan RL (1998) Measurement of light stable isotope ratios by SIMS: Matrix effects for oxygen, carbon, and sulfur isotopes in minerals. *Int J Mass Spectrom* 178:81–112.
- Allwood AC, et al. (2006) Controls on development and diversity of Early Archean stromatolites. *Proc Natl Acad Sci USA* 106:9548–9555.
- Robl TL, Davis BH (1993) Comparison of the HF-HCl and HF-BF<sub>3</sub> maceration techniques and the chemistry of resultant organic concentrates. *Org Geochem* 20:249–255.
- Schimmelmann A, Lawrence M, Michael E (2001) Stable isotope ratios of organic H, C, and N in the Miocene Monterey Formation, California. *The Monterey Formation; From Rocks to Molecules*, eds Isaac CM, Rullkoetter J (Columbia Univ Press, New York), pp 86–106.
- Schimmelmann A, Lewan MD, Wintsch RP (1999) D/H isotope ratios of kerogen, bitumen, oil, and water in hydrous pyrolysis of source rocks containing kerogen types I, II, IIS, and III. *Geochim Cosmochim Acta* 63:3751–3766.
- Giesemann A, Jaeger HJ, Norman AL, Krouse HR, Brand WA (1994) Online sulfur-isotope determination using an elemental analyzer coupled to a mass spectrometer. *Anal Chem* 66:2816–2819.
- Studley SA, et al. (2002) Analysis of sulfides in whole rock matrices by elemental analyzer-continuous flow isotope ratio mass spectrometry. *Chem Geol* 192:141–148.
- Johnston DT (2011) Multiple sulfur isotopes and the evolution of Earth's surface sulfur cycle. *Earth Sci Rev* 106:161–183.
- Fike DA, Gammon CL, Ziebis W, Orphan VJ (2008) Micron-scale mapping of sulfur cycling across the oxycline of a cyanobacterial mat: a paired nanoSIMS and CARD-FISH approach. *ISME J* 2:749–759.
- Slodzian G, Hillion F, Stadermann FJ, Zinner E (2004) QSA influences on isotopic ratio measurements. *Appl Surf Sci* 231–232:874–877.

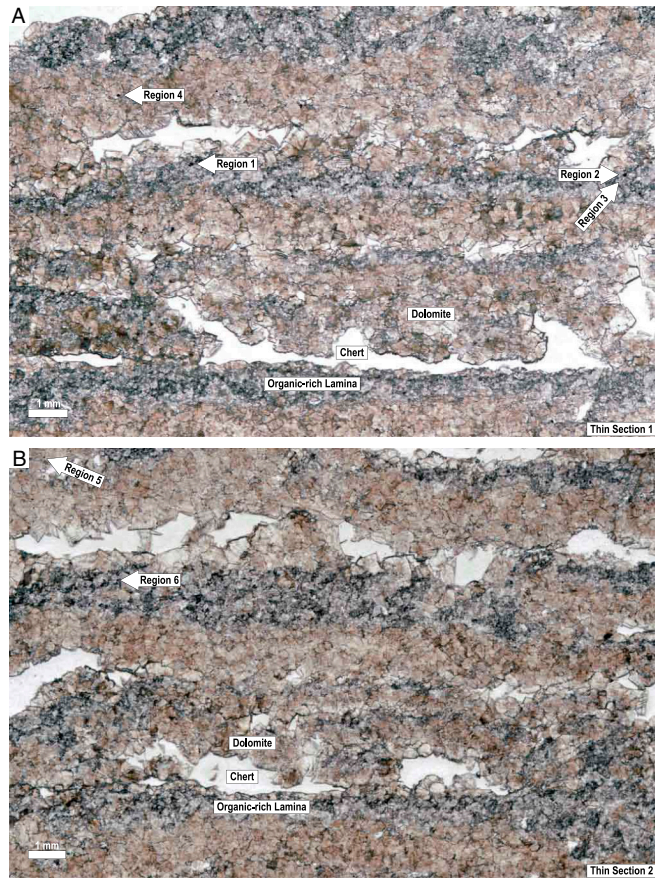

**Fig. S1.** Thin sections of the stromatolite sampled for nanoSIMS analysis. (A and B) Images were produced using a slide scanner. Arrows indicate the six regions (Fig. 2) where in situ measurements were performed.

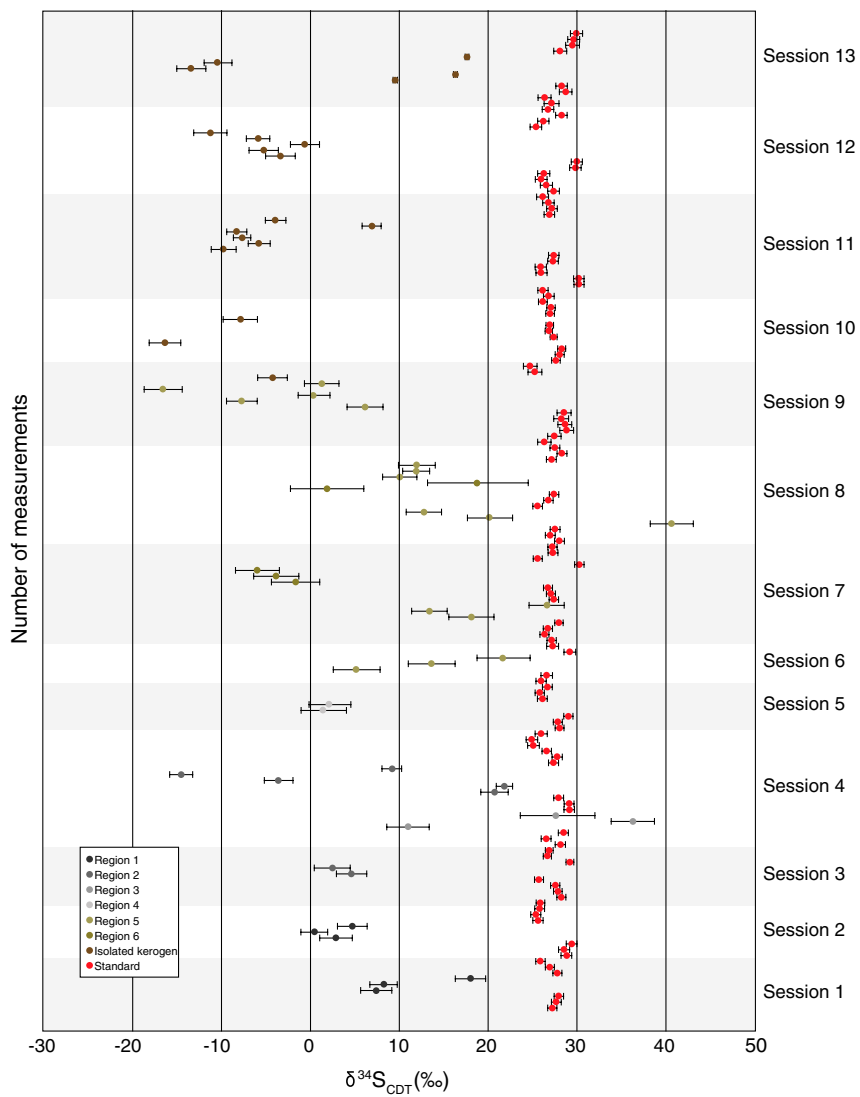

**Fig. S2.** Sulfur isotope data plotted in analytical sequence. Instrument mass fractionation during each session was corrected via linear regression relative to the Monterey kerogen (red dots), which has a bulk  $\delta^{34}\text{S}$  value of 27.2‰. Error bars indicate internal error (1 $\sigma$ ).



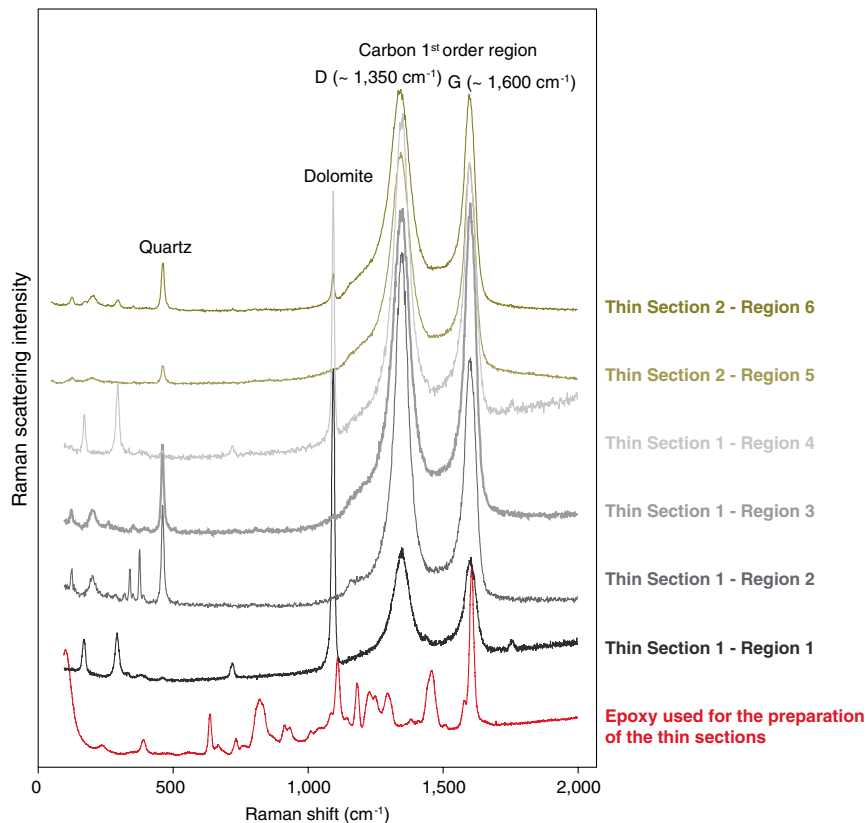

Fig. S3. Representative Raman spectra of the organic-rich regions analyzed by NanoSIMS. Main peaks correspond to quartz, dolomite, and disordered carbonaceous material (G and D bands in the carbon first-order region). Spectra were acquired using a Renishaw MicroRaman Spectrometer with argon ion laser (514.5 nm).

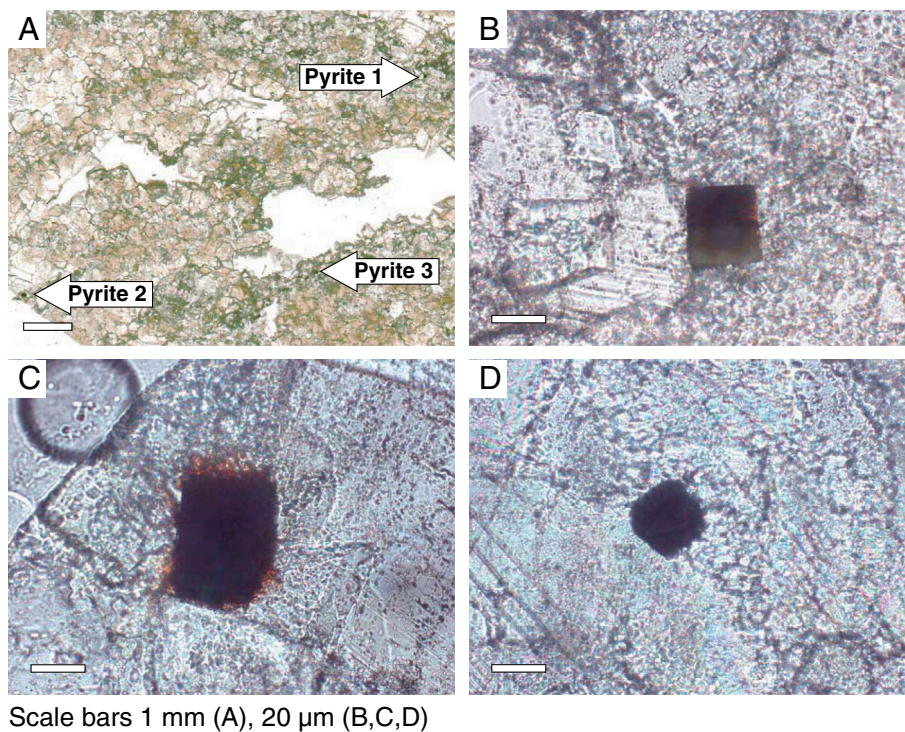

Fig. S4. Pyrite crystals present within the investigated stromatolite. (A) Overview of the thin section produced using a slide scanner. Arrows indicate the location of the pyrite crystals within the stromatolite. Scale bar, 1 mm. (B–E) Transmitted light photomicrographs showing the pyrite crystals that were analyzed by ion probe. Scale bars, 20  $\mu\text{m}$ .

**Table S1. Data from IRMS analyses**

| Sample* | Amount, mg | Wt. % S | Wt. % C <sup>†</sup> | Wt. % S/C | δ <sup>34</sup> S |
|---------|------------|---------|----------------------|-----------|-------------------|
| MON     | 0.400      | 14.9    | 49.9                 | 0.30      | 26.6              |
| MON     | 0.399      | 15.2    | 49.9                 | 0.30      | 27.4              |
| MON     | 0.400      | 15.0    | 49.9                 | 0.30      | 27.5              |
| MON     | 0.402      | 14.8    | 49.9                 | 0.30      | 27.3              |
| MON     | 0.406      | 15.4    | 49.9                 | 0.31      | 27.4              |
| GHA     | 0.379      | 13.5    | 64.8                 | 0.21      | 13.2              |
| GHA     | 0.423      | 13.2    | 64.8                 | 0.20      | 10.7              |
| SBB     | 0.410      | 8.4     | 44.8                 | 0.19      | -22.9             |
| SBB     | 0.398      | 8.7     | 44.8                 | 0.19      | -23.6             |
| WIL     | 5.106      | 6.8     | 68.2                 | 0.10      | 7.6               |
| WIL     | 4.999      | 3.8     | 68.2                 | 0.06      | 8.1               |

\*MON, kerogen isolated from Monterey Formation; GHA, kerogen from Ghareb Limestone; SBB, protokerogen from Santa Barbara Basin sediments; WIL, kerogen from the Wilcox group.

<sup>†</sup>Wt % C values were measured during a separate session.

**Table S2. Data from IMS-7f analyses**

| Session | Sample*  | <sup>32</sup> S cps <sup>†</sup> | raw δ <sup>34</sup> S <sup>†</sup> | δ <sup>34</sup> S <sup>‡</sup> | σ <sub>int</sub> <sup>¶</sup> | Σ <sub>IF</sub> <sup>  </sup> | <sup>32</sup> S/ <sup>12</sup> C |
|---------|----------|----------------------------------|------------------------------------|--------------------------------|-------------------------------|-------------------------------|----------------------------------|
| 1       | Standard | 150721193                        | 4.9                                | 26.9                           | 0.4                           | 1.4                           | 0.91                             |
| 1       | Standard | 109211507                        | 4.2                                | 26.2                           | 0.3                           | 1.4                           | 0.66                             |
| 1       | Standard | 162223253                        | 4.7                                | 26.7                           | 0.3                           | 1.4                           | 0.89                             |
| 1       | Standard | 127255113                        | 5.1                                | 27.1                           | 0.3                           | 1.4                           | 0.75                             |
| 1       | Standard | 104042480                        | 3.5                                | 25.5                           | 0.2                           | 1.4                           | 0.69                             |
| 1       | Standard | 110730547                        | 4.5                                | 26.5                           | 0.2                           | 1.4                           | 0.71                             |
| 1       | Standard | 119543840                        | 4.8                                | 26.8                           | 0.3                           | 1.4                           | 0.76                             |
| 1       | Standard | 101266626                        | 5.9                                | 27.9                           | 0.5                           | 1.4                           | 0.70                             |
| 1       | Standard | 95285724                         | 5.5                                | 27.5                           | 0.4                           | 1.4                           | 0.67                             |
| 1       | Standard | 114310710                        | 6.6                                | 28.6                           | 0.4                           | 1.4                           | 0.75                             |
| 1       | GHA      | 75520832                         | -12.7                              | 9.3                            | 0.3                           | 1.4                           | 0.76                             |
| 1       | GHA      | 65847908                         | -9.7                               | 12.3                           | 0.5                           | 1.4                           | 0.75                             |
| 1       | GHA      | 76810846                         | -11.1                              | 10.9                           | 0.3                           | 1.4                           | 0.73                             |
| 1       | GHA      | 73751044                         | -9.3                               | 12.7                           | 0.3                           | 1.4                           | 0.74                             |
| 1       | GHA      | 128501474                        | -10.5                              | 11.5                           | 0.5                           | 1.4                           | 0.80                             |
| 1       | GHA      | 136182490                        | -11.0                              | 11.0                           | 0.2                           | 1.4                           | 0.77                             |
| 1       | GHA      | 121598090                        | -10.2                              | 11.8                           | 0.3                           | 1.4                           | 0.76                             |
| 1       | GHA      | 124813733                        | -11.2                              | 10.8                           | 0.2                           | 1.4                           | 0.76                             |
| 1       | GHA      | 118557303                        | -11.8                              | 10.2                           | 0.3                           | 1.4                           | 0.73                             |
| 1       | GHA      | 130004027                        | -12.2                              | 9.8                            | 0.2                           | 1.4                           | 0.77                             |
| 1       | SBB      | 249589177                        | -54.6                              | -32.6                          | 0.4                           | 1.4                           | 1.69                             |
| 1       | SBB      | 124701017                        | -45.6                              | -23.6                          | 0.3                           | 1.4                           | 0.77                             |
| 1       | SBB      | 103417915                        | -45.0                              | -23.0                          | 0.5                           | 1.4                           | 0.61                             |
| 1       | SBB      | 171557810                        | -50.2                              | -28.2                          | 0.3                           | 1.4                           | 1.05                             |
| 1       | SBB      | 147372343                        | -40.3                              | -18.3                          | 0.5                           | 1.4                           | 0.92                             |
| 1       | SBB      | 136940430                        | -45.2                              | -23.2                          | 0.5                           | 1.4                           | 0.96                             |
| 1       | SBB      | 82123894                         | -42.4                              | -20.4                          | 0.3                           | 1.4                           | 0.59                             |
| 1       | SBB      | 117404464                        | -52.9                              | -30.9                          | 0.4                           | 1.4                           | 0.81                             |
| 1       | SBB      | 108221298                        | -42.9                              | -20.9                          | 0.3                           | 1.4                           | 0.88                             |
| 1       | SBB      | 178369817                        | -45.4                              | -23.4                          | 0.4                           | 1.4                           | 1.25                             |
| 1       | SBB      | 104947027                        | -45.1                              | -23.1                          | 0.8                           | 1.4                           | 0.68                             |
| 1       | SBB      | 99735236                         | -43.6                              | -21.6                          | 0.5                           | 1.4                           | 0.65                             |
| 1       | Standard | 13497652                         | 6.7                                | 28.7                           | 0.7                           | 1.4                           | 0.58                             |
| 1       | Standard | 13408442                         | 5.3                                | 27.3                           | 0.7                           | 1.4                           | 0.62                             |
| 1       | Standard | 14926185                         | 6.5                                | 28.5                           | 0.8                           | 1.4                           | 0.58                             |
| 1       | Standard | 16176984                         | 6.7                                | 28.7                           | 0.8                           | 1.4                           | 0.55                             |
| 1       | Standard | 33783324                         | 7.2                                | 29.2                           | 0.5                           | 1.4                           | 0.72                             |
| 1       | GHA      | 133126120                        | -9.8                               | 12.2                           | 0.2                           | 1.4                           | 0.80                             |
| 1       | GHA      | 127247897                        | -10.8                              | 11.2                           | 0.2                           | 1.4                           | 0.76                             |
| 1       | GHA      | 128790780                        | -10.7                              | 11.3                           | 0.2                           | 1.4                           | 0.80                             |
| 1       | GHA      | 117583293                        | -13.3                              | 8.7                            | 0.2                           | 1.4                           | 0.76                             |
| 1       | GHA      | 122174910                        | -9.8                               | 12.2                           | 0.2                           | 1.4                           | 0.75                             |
| 1       | WIL      | 27783114                         | -16.2                              | 5.8                            | 0.3                           | 1.4                           | 0.051                            |
| 1       | WIL      | 30449841                         | -18.0                              | 4.0                            | 0.4                           | 1.4                           | 0.048                            |
| 1       | WIL      | 28249800                         | -17.3                              | 4.7                            | 0.2                           | 1.4                           | 0.048                            |
| 1       | WIL      | 33244760                         | -19.1                              | 2.9                            | 1.4                           | 1.4                           | 0.048                            |
| 1       | WIL      | 24751366                         | -17.1                              | 4.9                            | 0.6                           | 1.4                           | 0.050                            |
| 1       | WIL      | 30851787                         | -19.6                              | 2.4                            | 0.3                           | 1.4                           | 0.049                            |
| 1       | WIL      | 26692232                         | -21.4                              | 0.6                            | 2.1                           | 1.4                           | 0.047                            |
| 1       | WIL      | 30860679                         | -22.2                              | -0.2                           | 0.3                           | 1.4                           | 0.054                            |
| 1       | WIL      | 29419364                         | -16.4                              | 5.6                            | 0.6                           | 1.4                           | 0.042                            |

| Session | Sample*  | <sup>32</sup> S cps <sup>†</sup> | raw $\delta^{34}\text{S}^{\ddagger}$ | $\delta^{34}\text{S}^{\S}$ | $\sigma_{\text{int}}^{\parallel}$ | $\Sigma_{\text{IF}}^{\parallel}$ | <sup>32</sup> S/ <sup>12</sup> C |
|---------|----------|----------------------------------|--------------------------------------|----------------------------|-----------------------------------|----------------------------------|----------------------------------|
| 1       | WIL      | 28256023                         | -18.9                                | 3.1                        | 0.4                               | 1.4                              | 0.045                            |
| 1       | Standard | 365861530                        | 4.8                                  | 26.8                       | 0.2                               | 1.4                              | 0.753                            |
| 1       | Standard | 335844225                        | 5.4                                  | 27.4                       | 0.2                               | 1.4                              | 0.807                            |
| 1       | Standard | 154928815                        | 6.2                                  | 28.2                       | 0.3                               | 1.4                              | 0.898                            |
| 1       | Standard | 361880440                        | 1.5                                  | 23.5                       | 0.7                               | 1.4                              | 1.034                            |
| 1       | Standard | 340484225                        | 3.6                                  | 25.6                       | 0.3                               | 1.4                              | 0.828                            |
| 1       | GHA      | 278830395                        | -11.3                                | 10.7                       | 0.3                               | 1.4                              | 0.862                            |
| 1       | GHA      | 275497295                        | -11.4                                | 10.6                       | 0.5                               | 1.4                              | 0.830                            |
| 2       | Standard | 245489                           | 8.8                                  | 28.2                       | 1.0                               | 1.9                              | 0.66                             |
| 2       | Standard | 232561                           | 7.9                                  | 27.3                       | 0.8                               | 1.9                              | 0.62                             |
| 2       | Standard | 229092                           | 8.3                                  | 27.6                       | 0.9                               | 1.9                              | 0.67                             |
| 2       | Standard | 242065                           | 4.9                                  | 24.2                       | 1.0                               | 1.9                              | 0.77                             |
| 2       | Standard | 301627                           | 7.7                                  | 27.0                       | 0.9                               | 1.9                              | 0.85                             |
| 2       | Standard | 286679                           | 10.6                                 | 30.0                       | 1.0                               | 1.9                              | 0.96                             |
| 2       | Standard | 223664                           | 5.2                                  | 24.5                       | 1.2                               | 1.9                              | 0.96                             |
| 2       | Standard | 201721                           | 5.4                                  | 24.7                       | 1.0                               | 1.9                              | 1.10                             |
| 2       | Standard | 304660                           | 7.3                                  | 26.6                       | 1.0                               | 1.9                              | 0.72                             |
| 2       | Standard | 283670                           | 10.2                                 | 29.6                       | 0.9                               | 1.9                              | 0.69                             |
| 2       | OM       | 143391                           | -32.4                                | -13.1                      | 1.7                               | 1.9                              | 0.36                             |
| 2       | OM       | 139411                           | -32.1                                | -12.8                      | 1.3                               | 1.9                              | 0.27                             |
| 2       | OM       | 151299                           | -34.0                                | -14.6                      | 1.2                               | 1.9                              | 0.31                             |
| 2       | OM       | 157973                           | -32.2                                | -12.9                      | 2.1                               | 1.9                              | 0.25                             |
| 2       | OM       | 164323                           | -34.3                                | -14.9                      | 1.5                               | 1.9                              | 0.32                             |
| 2       | Standard | 374591                           | 6.5                                  | 25.8                       | 0.9                               | 1.9                              | 0.69                             |
| 2       | Standard | 386446                           | 8.5                                  | 27.9                       | 1.0                               | 1.9                              | 0.67                             |
| 2       | Standard | 433415                           | 10.9                                 | 30.3                       | 0.7                               | 1.9                              | 0.72                             |
| 2       | Standard | 416575                           | 7.9                                  | 27.2                       | 0.9                               | 1.9                              | 0.74                             |
| 3       | Standard | 272949                           | 9.1                                  | 28.2                       | 0.9                               | 1.9                              | 0.81                             |
| 3       | Standard | 309715                           | 7.7                                  | 26.8                       | 1.1                               | 1.9                              | 1.02                             |
| 3       | Standard | 245489                           | 8.8                                  | 27.9                       | 1.0                               | 1.9                              | 0.66                             |
| 3       | Standard | 232561                           | 7.9                                  | 27.0                       | 0.8                               | 1.9                              | 0.62                             |
| 3       | Standard | 229092                           | 8.3                                  | 27.4                       | 0.9                               | 1.9                              | 0.67                             |
| 3       | Standard | 242065                           | 4.9                                  | 24.0                       | 1.0                               | 1.9                              | 0.77                             |
| 3       | Standard | 301627                           | 7.7                                  | 26.8                       | 0.9                               | 1.9                              | 0.85                             |
| 3       | Standard | 286679                           | 10.6                                 | 29.7                       | 1.0                               | 1.9                              | 0.96                             |
| 3       | Standard | 223664                           | 5.2                                  | 24.3                       | 1.2                               | 1.9                              | 0.96                             |
| 3       | Standard | 201721                           | 5.4                                  | 24.5                       | 1.0                               | 1.9                              | 1.10                             |
| 3       | Standard | 304660                           | 7.3                                  | 26.4                       | 1.0                               | 1.9                              | 0.72                             |
| 3       | Standard | 283670                           | 10.2                                 | 29.3                       | 0.9                               | 1.9                              | 0.69                             |
| 3       | OM       | 143391                           | -32.4                                | -13.3                      | 1.7                               | 1.9                              | 0.36                             |
| 3       | OM       | 139411                           | -32.1                                | -13.0                      | 1.3                               | 1.9                              | 0.27                             |
| 3       | OM       | 151299                           | -34.0                                | -14.9                      | 1.2                               | 1.9                              | 0.31                             |
| 3       | OM       | 157973                           | -32.2                                | -13.1                      | 2.1                               | 1.9                              | 0.25                             |
| 3       | OM       | 164323                           | -34.3                                | -15.2                      | 1.5                               | 1.9                              | 0.32                             |
| 3       | Standard | 394400                           | 10.4                                 | 29.5                       | 1.1                               | 1.9                              | 1.00                             |
| 3       | Standard | 374591                           | 6.5                                  | 25.6                       | 0.9                               | 1.9                              | 0.69                             |
| 3       | Standard | 386446                           | 8.5                                  | 27.6                       | 1.0                               | 1.9                              | 0.67                             |
| 3       | Standard | 433415                           | 10.9                                 | 30.0                       | 0.7                               | 1.9                              | 0.72                             |
| 3       | Standard | 416575                           | 7.9                                  | 27.0                       | 0.9                               | 1.9                              | 0.74                             |
| 3       | OM       | 124366                           | -26.8                                | -7.7                       | 2.0                               | 1.9                              | 0.21                             |
| 3       | OM       | 127985                           | -21.9                                | -2.8                       | 2.1                               | 1.9                              | 0.18                             |
| 3       | OM       | 136396                           | -27.3                                | -8.2                       | 1.9                               | 1.9                              | 0.20                             |
| 3       | OM       | 77752                            | -22.2                                | -3.1                       | 2.3                               | 1.9                              | 0.27                             |
| 3       | OM       | 56852                            | -30.7                                | -11.6                      | 2.7                               | 1.9                              | 0.20                             |
| 3       | OM       | 152961                           | -26.7                                | -7.6                       | 1.7                               | 1.9                              | 0.19                             |
| 3       | OM       | 112715                           | -33.5                                | -14.4                      | 2.1                               | 1.9                              | 0.21                             |
| 3       | OM       | 113631                           | -22.9                                | -3.8                       | 1.4                               | 1.9                              | 0.19                             |

\*Standard, kerogen isolated from Monterey Formation; SBB, protokerogen from recent Santa Barbara Basin sediments; GHA, kerogen from Ghareb Limestone; WIL, kerogen from the Wilcox group; OM, kerogen extracted from Strelley Pool stromatolite.

<sup>†</sup><sup>32</sup>S ion current expressed in counts per second.

<sup>‡</sup>Raw sulfur isotope composition of kerogen (i.e., noncorrected for instrumental mass fractionation) expressed in ‰ relative to the V-CDT standard.

<sup>§</sup>Sulfur isotope composition of kerogen corrected for instrumental mass fractionation and expressed in ‰ relative to the V-CDT standard.

<sup>||</sup>Internal error (1 $\sigma$ ).

<sup>||</sup>Standard deviation (1 $\sigma$ ) for the linear regression used to correct for the instrumental mass fractionation during each session.

Table S3. Data from IMS-7f analyses including  $^{33}\text{S}$ 

| Session | Sample*    | $^{32}\text{S}$ cps <sup>†</sup> | raw $\delta^{34}\text{S}$ <sup>‡</sup> | $\delta^{34}\text{S}$ <sup>§</sup> | $\sigma_{\text{int}}$ <sup>¶</sup> | $\Sigma_{\text{IF}}$ <sup>  </sup> | raw $\Delta^{33}\text{S}$ | $\sigma_{\text{int}}$ | raw $\Delta^{33}\text{S}$ <sup>**</sup> | $\Delta^{33}\text{S}$ | $\Sigma_{\text{IF}}$ <sup>††</sup> |
|---------|------------|----------------------------------|----------------------------------------|------------------------------------|------------------------------------|------------------------------------|---------------------------|-----------------------|-----------------------------------------|-----------------------|------------------------------------|
| 4       | OM         | 5915171                          | 6.9                                    | -12.7                              | 0.3                                | 2.8                                | 14.7                      | 0.3                   | 11.1                                    | 0.6                   | 0.5                                |
| 4       | OM         | 6060225                          | 9.4                                    | -10.2                              | 0.4                                | 2.8                                | 17.0                      | 0.4                   | 12.1                                    | 1.5                   | 0.5                                |
| 4       | OM         | 6725554                          | 6.8                                    | -12.8                              | 0.3                                | 2.8                                | 16.2                      | 0.5                   | 12.6                                    | 2.1                   | 0.5                                |
| 4       | OM         | 5749545                          | 8.1                                    | -11.5                              | 0.3                                | 2.8                                | 16.0                      | 0.4                   | 11.8                                    | 1.3                   | 0.5                                |
| 4       | MON        | 17087775                         | 49.6                                   | 30.0                               | 0.2                                | 2.8                                | 36.1                      | 0.2                   | 10.4                                    | -0.2                  | 0.5                                |
| 4       | MON        | 17791051                         | 49.5                                   | 29.9                               | 0.2                                | 2.8                                | 36.2                      | 0.2                   | 10.5                                    | 0.0                   | 0.5                                |
| 4       | MON        | 17990420                         | 48.4                                   | 28.8                               | 0.1                                | 2.8                                | 35.7                      | 0.2                   | 10.6                                    | 0.1                   | 0.5                                |
| 4       | MON        | 17789843                         | 48.0                                   | 28.4                               | 0.2                                | 2.8                                | 35.3                      | 0.2                   | 10.4                                    | -0.1                  | 0.5                                |
| 4       | GHA        | 2953099                          | 37.1                                   | 17.5                               | 0.3                                | 2.8                                | 30.9                      | 0.3                   | 11.7                                    | 1.1                   | 0.5                                |
| 4       | GHA        | 4779879                          | 36.7                                   | 17.1                               | 0.3                                | 2.8                                | 29.7                      | 0.3                   | 10.7                                    | 0.1                   | 0.5                                |
| 4       | GHA        | 4030874                          | 34.1                                   | 14.5                               | 0.2                                | 2.8                                | 28.2                      | 0.4                   | 10.5                                    | -0.1                  | 0.5                                |
| 4       | GHA        | 6653332                          | 37.8                                   | 18.2                               | 0.3                                | 2.8                                | 31.0                      | 0.2                   | 11.4                                    | 0.8                   | 0.5                                |
| 4       | WIL        | 7415625                          | 25.9                                   | 6.3                                | 0.2                                | 2.8                                | 24.1                      | 0.2                   | 10.7                                    | 0.2                   | 0.5                                |
| 4       | WIL        | 6469002                          | 17.4                                   | -2.2                               | 0.3                                | 2.8                                | 19.4                      | 0.3                   | 10.4                                    | -0.2                  | 0.5                                |
| 4       | WIL        | 7599388                          | 23.7                                   | 4.1                                | 0.2                                | 2.8                                | 22.4                      | 0.3                   | 10.1                                    | -0.4                  | 0.5                                |
| 4       | WIL        | 7437088                          | 22.5                                   | 2.9                                | 0.3                                | 2.8                                | 22.3                      | 0.3                   | 10.7                                    | 0.1                   | 0.5                                |
| 4       | OM         | 5633382                          | 4.8                                    | -14.8                              | 0.4                                | 2.8                                | 13.5                      | 0.5                   | 11.0                                    | 0.5                   | 0.5                                |
| 4       | OM         | 5695818                          | 5.9                                    | -13.7                              | 0.3                                | 2.8                                | 13.4                      | 0.4                   | 10.4                                    | -0.2                  | 0.5                                |
| 4       | OM         | 5475231                          | 6.5                                    | -13.1                              | 0.3                                | 2.8                                | 14.5                      | 0.4                   | 11.1                                    | 0.6                   | 0.5                                |
| 4       | OM         | 7436494                          | 3.6                                    | -16.0                              | 0.2                                | 2.8                                | 14.1                      | 0.3                   | 12.2                                    | 1.6                   | 0.5                                |
| 4       | OM         | 7840984                          | 6.7                                    | -12.9                              | 0.2                                | 2.8                                | 14.6                      | 0.3                   | 11.2                                    | 0.6                   | 0.5                                |
| 4       | OM         | 6180366                          | 7.8                                    | -11.8                              | 0.2                                | 2.8                                | 15.3                      | 0.4                   | 11.3                                    | 0.7                   | 0.5                                |
| 4       | OM         | 5999450                          | 9.3                                    | -10.3                              | 0.2                                | 2.8                                | 15.7                      | 0.3                   | 10.9                                    | 0.3                   | 0.5                                |
| 4       | OM         | 6047830                          | 9.2                                    | -10.4                              | 0.4                                | 2.8                                | 15.6                      | 0.4                   | 10.8                                    | 0.3                   | 0.5                                |
| 4       | OM         | 5723440                          | 8.3                                    | -11.3                              | 0.3                                | 2.8                                | 14.9                      | 0.3                   | 10.6                                    | 0.1                   | 0.5                                |
| 4       | MON        | 16173804                         | 43.9                                   | 24.3                               | 0.1                                | 2.8                                | 33.1                      | 0.2                   | 10.4                                    | -0.2                  | 0.5                                |
| 4       | MON        | 17073002                         | 43.0                                   | 23.4                               | 0.1                                | 2.8                                | 32.2                      | 0.2                   | 9.9                                     | -0.7                  | 0.5                                |
| 4       | MON        | 15223072                         | 44.8                                   | 25.2                               | 0.2                                | 2.8                                | 33.1                      | 0.2                   | 9.8                                     | -0.7                  | 0.5                                |
| 5       | Pyrite 1   | 19853441                         | 7.6                                    | -18.6                              | 0.6                                | 1.0                                | 14.9                      | 0.7                   | 11.0                                    | 1.0                   | 0.2                                |
| 5       | Pyrite 1   | 22141295                         | 13.6                                   | -12.5                              | 0.8                                | 1.0                                | 16.6                      | 0.7                   | 9.6                                     | -0.4                  | 0.2                                |
| 5       | Pyrite 1   | 22665664                         | 11.4                                   | -14.7                              | 0.8                                | 1.0                                | 16.6                      | 0.7                   | 10.6                                    | 0.7                   | 0.2                                |
| 5       | Pyrite 2   | 17713296                         | 15.7                                   | -10.5                              | 0.2                                | 1.0                                | 18.5                      | 0.1                   | 10.3                                    | 0.4                   | 0.2                                |
| 5       | Pyrite 2   | 19756705                         | 17.1                                   | -9.1                               | 0.2                                | 1.0                                | 18.9                      | 0.2                   | 10.0                                    | 0.1                   | 0.2                                |
| 5       | Pyrite Std | 15767140                         | 36.7                                   | 10.5                               | 0.2                                | 1.0                                | 28.9                      | 0.2                   | 9.9                                     | 0.0                   | 0.2                                |
| 5       | Pyrite Std | 15343253                         | 35.7                                   | 9.6                                | 0.2                                | 1.0                                | 28.7                      | 0.2                   | 10.2                                    | 0.3                   | 0.2                                |
| 5       | Pyrite Std | 14380903                         | 34.0                                   | 7.9                                | 0.2                                | 1.0                                | 27.4                      | 0.2                   | 9.8                                     | -0.1                  | 0.2                                |
| 5       | Pyrite 3   | 14633530                         | 20.5                                   | -5.6                               | 0.2                                | 1.0                                | 20.5                      | 0.2                   | 9.9                                     | 0.0                   | 0.2                                |
| 5       | Pyrite 3   | 14423422                         | 20.8                                   | -5.4                               | 0.2                                | 1.0                                | 20.5                      | 0.2                   | 9.8                                     | -0.2                  | 0.2                                |
| 5       | Pyrite 3   | 13879523                         | 19.8                                   | -6.3                               | 0.2                                | 1.0                                | 20.6                      | 0.1                   | 10.3                                    | 0.4                   | 0.2                                |
| 5       | Pyrite Std | 13826458                         | 35.3                                   | 9.1                                | 0.2                                | 1.0                                | 28.0                      | 0.2                   | 9.7                                     | -0.3                  | 0.2                                |
| 5       | Pyrite Std | 13302279                         | 34.8                                   | 8.6                                | 0.1                                | 1.0                                | 27.9                      | 0.2                   | 9.9                                     | 0.0                   | 0.2                                |
| 5       | Pyrite Std | 12876311                         | 34.4                                   | 8.2                                | 0.1                                | 1.0                                | 28.0                      | 0.2                   | 10.1                                    | 0.2                   | 0.2                                |

\*MON, kerogen isolated from Monterey Formation; GHA, kerogen from Ghareb Limestone; WIL, kerogen from the Wilcox group; OM, kerogen extracted from Strelley Pool stromatolite; Pyrite Std, pyrite standard with a  $\delta^{34}\text{S}_{\text{CDT}}$  of 9‰; Pyrite x, pyrite crystals measured in situ from Strelley Pool stromatolite thin sections.

<sup>†</sup> $^{32}\text{S}$  ion current expressed in counts per second.

<sup>‡</sup>Raw sulfur isotope composition of kerogen (i.e., noncorrected for instrumental mass fractionation) expressed in ‰ relative to the V-CDT standard.

<sup>§</sup>Sulfur isotope composition of kerogen corrected for instrumental mass fractionation and expressed in ‰ relative to the V-CDT standard.

<sup>¶</sup>Internal error (1 $\sigma$ ).

<sup>||</sup>Standard deviation (1 $\sigma$ ) for the linear regression used to correct for the instrumental mass fractionation during each session.

<sup>\*\*</sup> $\Delta^{33}\text{S} = \delta^{33}\text{S}_{\text{CDT}} - 0.5185 \cdot \delta^{34}\text{S}_{\text{CDT}}$ .

<sup>††</sup>Standard deviation (1 $\sigma$ ) for the linear regression used to correct for the instrumental mass fractionation during each session. Bulk  $\Delta^{33}\text{S}_{\text{CDT}}$  of MON, GHA, and WIL is unknown. The linear regression was made assuming that their average  $\Delta^{33}\text{S}$  value equals 0.



Table S4. Data from NanoSIMS analyses

| Session | Sample*  | $^{34}\text{S}/^{32}\text{S}^{\dagger}$ | $^{32}\text{S}$ cps $^{\ddagger}$ | $\delta^{34}\text{S}^{\S}$ | $\sigma_{\text{int}}^{\parallel}$ | $\Sigma_{\text{IF}}^{\parallel}$ | $K_{\text{cor}}^{**}$ | $\delta^{34}\text{S}^{\dagger\dagger}$ | $\text{Si/C}^{\dagger\dagger}$ | $\text{O/C}^{\dagger\dagger}$ |
|---------|----------|-----------------------------------------|-----------------------------------|----------------------------|-----------------------------------|----------------------------------|-----------------------|----------------------------------------|--------------------------------|-------------------------------|
| 1       | Standard | 0.0478                                  | 397502                            | 27.1                       | 0.5                               | 0.7                              | 0.0126                | 27.2                                   |                                |                               |
| 1       | Standard | 0.0478                                  | 391503                            | 27.5                       | 0.5                               | 0.7                              | 0.0124                | 27.6                                   |                                |                               |
| 1       | Standard | 0.0478                                  | 384792                            | 27.7                       | 0.5                               | 0.7                              | 0.0122                | 27.9                                   |                                |                               |
| 1       | Region 1 | 0.0468                                  | 5063                              | 3.9                        | 1.7                               | 0.7                              | 0.0002                | 7.4                                    | 0.12                           | 1.51                          |
| 1       | Region 1 | 0.0468                                  | 7095                              | 4.8                        | 1.5                               | 0.7                              | 0.0002                | 8.2                                    | 0.13                           | 1.14                          |
| 1       | Region 1 | 0.0472                                  | 5753                              | 14.5                       | 1.7                               | 0.7                              | 0.0002                | 18.0                                   | 0.08                           | 1.29                          |
| 1       | Standard | 0.0478                                  | 440279                            | 28.0                       | 0.5                               | 0.7                              | 0.0139                | 27.8                                   |                                |                               |
| 1       | Standard | 0.0478                                  | 431134                            | 27.1                       | 0.5                               | 0.7                              | 0.0136                | 26.9                                   |                                |                               |
| 1       | Standard | 0.0477                                  | 416411                            | 25.9                       | 0.5                               | 0.7                              | 0.0132                | 25.8                                   |                                |                               |
| 2       | Standard | 0.0482                                  | 296053                            | 28.6                       | 0.6                               | 1.7                              | 0.0093                | 28.7                                   |                                |                               |
| 2       | Standard | 0.0482                                  | 296942                            | 28.4                       | 0.6                               | 1.7                              | 0.0094                | 28.5                                   |                                |                               |
| 2       | Standard | 0.0483                                  | 286103                            | 29.1                       | 0.6                               | 1.7                              | 0.0090                | 29.3                                   |                                |                               |
| 2       | Region 1 | 0.0470                                  | 5307                              | 0.2                        | 1.8                               | 1.7                              | 0.0002                | 2.8                                    | 0.16                           | 2.36                          |
| 2       | Region 1 | 0.0469                                  | 7603                              | -2.2                       | 1.5                               | 1.7                              | 0.0002                | 0.4                                    | 0.14                           | 1.10                          |
| 2       | Region 1 | 0.0471                                  | 6144                              | 2.1                        | 1.7                               | 1.7                              | 0.0002                | 4.7                                    | 0.24                           | 2.78                          |
| 2       | Standard | 0.0481                                  | 332433                            | 25.8                       | 0.6                               | 1.7                              | 0.0105                | 25.6                                   |                                |                               |
| 2       | Standard | 0.0481                                  | 321682                            | 25.4                       | 0.6                               | 1.7                              | 0.0102                | 25.3                                   |                                |                               |
| 2       | Standard | 0.0481                                  | 325504                            | 25.9                       | 0.6                               | 1.7                              | 0.0103                | 25.8                                   |                                |                               |
| 3       | Standard | 0.0479                                  | 373518                            | 25.6                       | 0.5                               | 1.3                              | 0.0118                | 25.8                                   |                                |                               |
| 3       | Standard | 0.0480                                  | 404934                            | 28.2                       | 0.5                               | 1.3                              | 0.0128                | 28.2                                   |                                |                               |
| 3       | Standard | 0.0480                                  | 397859                            | 27.8                       | 0.5                               | 1.3                              | 0.0126                | 27.8                                   |                                |                               |
| 3       | Standard | 0.0480                                  | 388065                            | 27.4                       | 0.5                               | 1.3                              | 0.0123                | 27.5                                   |                                |                               |
| 3       | Standard | 0.0479                                  | 380175                            | 25.5                       | 0.5                               | 1.3                              | 0.0120                | 25.7                                   |                                |                               |
| 3       | Region 2 | 0.0468                                  | 5707                              | 1.2                        | 1.7                               | 1.3                              | 0.0002                | 4.6                                    | 0.24                           | 4.62                          |
| 3       | Region 2 | 0.0467                                  | 4485                              | -1.0                       | 2.0                               | 1.3                              | 0.0001                | 2.4                                    | 0.34                           | 8.43                          |
| 3       | Standard | 0.0481                                  | 424201                            | 29.3                       | 0.4                               | 1.3                              | 0.0134                | 29.2                                   |                                |                               |
| 3       | Standard | 0.0480                                  | 421809                            | 26.8                       | 0.5                               | 1.3                              | 0.0133                | 26.6                                   |                                |                               |
| 3       | Standard | 0.0480                                  | 430738                            | 27.1                       | 0.4                               | 1.3                              | 0.0136                | 26.8                                   |                                |                               |
| 4       | Standard | 0.0481                                  | 372664                            | 28.3                       | 0.6                               | 1.7                              | 0.0118                | 28.1                                   |                                |                               |
| 4       | Standard | 0.0481                                  | 379485                            | 26.8                       | 0.6                               | 1.7                              | 0.0120                | 26.5                                   |                                |                               |
| 4       | Standard | 0.0481                                  | 384121                            | 28.7                       | 0.6                               | 1.7                              | 0.0121                | 28.4                                   |                                |                               |
| 4       | Region 3 | 0.0472                                  | 2601                              | 8.0                        | 2.4                               | 1.7                              | 0.0001                | 10.9                                   | 0.55                           | 7.50                          |
| 4       | Region 3 | 0.0483                                  | 2337                              | 33.3                       | 2.4                               | 1.7                              | 0.0001                | 36.2                                   | 0.78                           | 7.33                          |
| 4       | Region 3 | 0.0480                                  | 892                               | 24.9                       | 4.2                               | 1.7                              | 0.0000                | 27.8                                   | 0.62                           | 10.92                         |
| 4       | Standard | 0.0482                                  | 367454                            | 29.3                       | 0.6                               | 1.7                              | 0.0116                | 29.1                                   |                                |                               |
| 4       | Standard | 0.0482                                  | 372479                            | 29.3                       | 0.6                               | 1.7                              | 0.0118                | 29.1                                   |                                |                               |
| 4       | Standard | 0.0481                                  | 371480                            | 28.1                       | 0.6                               | 1.7                              | 0.0117                | 27.9                                   |                                |                               |
| 4       | Region 2 | 0.0477                                  | 15533                             | 17.9                       | 1.5                               | 1.7                              | 0.0005                | 20.7                                   | 0.83                           | 18.08                         |
| 4       | Region 2 | 0.0477                                  | 45115                             | 19.2                       | 0.9                               | 1.7                              | 0.0014                | 21.8                                   | 0.53                           | 9.83                          |
| 4       | Region 2 | 0.0466                                  | 11003                             | -6.5                       | 1.6                               | 1.7                              | 0.0003                | -3.6                                   | 0.53                           | 15.58                         |
| 4       | Region 2 | 0.0461                                  | 16473                             | -17.4                      | 1.3                               | 1.7                              | 0.0005                | -14.6                                  | 0.51                           | 18.16                         |
| 4       | Region 2 | 0.0471                                  | 21560                             | 6.4                        | 1.1                               | 1.7                              | 0.0007                | 9.1                                    | 0.65                           | 16.79                         |
| 4       | Standard | 0.0481                                  | 344498                            | 27.3                       | 0.6                               | 1.7                              | 0.0109                | 27.3                                   |                                |                               |
| 4       | Standard | 0.0481                                  | 346840                            | 27.7                       | 0.6                               | 1.7                              | 0.0110                | 27.7                                   |                                |                               |
| 4       | Standard | 0.0480                                  | 345544                            | 26.6                       | 0.5                               | 1.7                              | 0.0109                | 26.5                                   |                                |                               |
| 4       | Standard | 0.0480                                  | 280541                            | 24.5                       | 0.7                               | 1.7                              | 0.0089                | 25.0                                   |                                |                               |
| 4       | Standard | 0.0479                                  | 284230                            | 24.3                       | 0.6                               | 1.7                              | 0.0090                | 24.9                                   |                                |                               |
| 4       | Standard | 0.0480                                  | 288242                            | 25.4                       | 0.7                               | 1.7                              | 0.0091                | 25.9                                   |                                |                               |
| 5       | Standard | 0.0483                                  | 401577                            | 28.2                       | 0.5                               | 1.4                              | 0.0127                | 28.0                                   |                                |                               |
| 5       | Standard | 0.0483                                  | 402033                            | 28.0                       | 0.5                               | 1.4                              | 0.0127                | 27.8                                   |                                |                               |
| 5       | Standard | 0.0483                                  | 397932                            | 29.1                       | 0.5                               | 1.4                              | 0.0126                | 29.0                                   |                                |                               |
| 5       | Region 4 | 0.0469                                  | 1753                              | -1.8                       | 2.6                               | 1.4                              | 0.0001                | 1.5                                    | 0.01                           | 3.34                          |
| 5       | Region 4 | 0.0470                                  | 2042                              | -1.1                       | 2.3                               | 1.4                              | 0.0001                | 2.1                                    | 0.04                           | 2.60                          |
| 5       | Standard | 0.0482                                  | 364872                            | 25.9                       | 0.6                               | 1.4                              | 0.0115                | 26.1                                   |                                |                               |
| 5       | Standard | 0.0482                                  | 361253                            | 25.6                       | 0.5                               | 1.4                              | 0.0114                | 25.8                                   |                                |                               |
| 5       | Standard | 0.0482                                  | 360169                            | 26.4                       | 0.6                               | 1.4                              | 0.0114                | 26.6                                   |                                |                               |
| 6       | Standard | 0.0486                                  | 322269                            | 26.4                       | 0.6                               | 1.2                              | 0.0149                | 25.9                                   |                                |                               |
| 6       | Standard | 0.0486                                  | 300432                            | 26.7                       | 0.6                               | 1.2                              | 0.0138                | 26.5                                   |                                |                               |
| 6       | Region 5 | 0.0475                                  | 8273                              | 1.7                        | 2.6                               | 1.2                              | 0.0004                | 5.1                                    | 0.12                           | 0.00                          |
| 6       | Region 5 | 0.0479                                  | 7890                              | 10.1                       | 2.6                               | 1.2                              | 0.0004                | 13.6                                   | 0.08                           | 0.00                          |
| 6       | Region 5 | 0.0482                                  | 6550                              | 18.2                       | 3.0                               | 1.2                              | 0.0003                | 21.7                                   | 0.10                           | 0.00                          |
| 6       | Standard | 0.0487                                  | 275398                            | 29.0                       | 0.7                               | 1.2                              | 0.0127                | 29.1                                   |                                |                               |
| 6       | Standard | 0.0486                                  | 243335                            | 26.7                       | 0.7                               | 1.2                              | 0.0112                | 27.2                                   |                                |                               |
| 7       | Standard | 0.0486                                  | 293958                            | 26.7                       | 0.5                               | 1.2                              | 0.0135                | 27.1                                   |                                |                               |
| 7       | Standard | 0.0486                                  | 312876                            | 26.1                       | 0.5                               | 1.2                              | 0.0144                | 26.3                                   |                                |                               |
| 7       | Standard | 0.0486                                  | 320124                            | 26.6                       | 0.5                               | 1.2                              | 0.0148                | 26.7                                   |                                |                               |
| 7       | Standard | 0.0487                                  | 363264                            | 28.4                       | 0.5                               | 1.2                              | 0.0168                | 27.9                                   |                                |                               |
| 7       | Region 5 | 0.0481                                  | 6536                              | 14.1                       | 2.5                               | 1.2                              | 0.0003                | 18.1                                   | 0.17                           | 0.01                          |
| 7       | Region 5 | 0.0479                                  | 7259                              | 9.3                        | 2.0                               | 1.2                              | 0.0003                | 13.3                                   | 0.21                           | 0.01                          |

| Session | Sample*  | $^{34}\text{S}/^{32}\text{S}^{\dagger}$ | $^{32}\text{S}$ cps <sup>†</sup> | $\delta^{34}\text{S}^{\ddagger}$ | $\sigma_{\text{int}}^{\parallel}$ | $\Sigma_{\text{IF}}^{\parallel}$ | $K_{\text{cor}}^{**}$ | $\delta^{34}\text{S}^{++}$ | Si/C <sup>++</sup> | O/C <sup>++</sup> |
|---------|----------|-----------------------------------------|----------------------------------|----------------------------------|-----------------------------------|----------------------------------|-----------------------|----------------------------|--------------------|-------------------|
| 7       | Region 5 | 0.0485                                  | 7613                             | 22.5                             | 2.0                               | 1.2                              | 0.0003                | 26.5                       | 0.16               | 0.01              |
| 7       | Standard | 0.0487                                  | 337484                           | 27.5                             | 0.5                               | 1.2                              | 0.0156                | 27.3                       |                    |                   |
| 7       | Standard | 0.0487                                  | 319235                           | 26.9                             | 0.5                               | 1.2                              | 0.0147                | 27.0                       |                    |                   |
| 7       | Standard | 0.0486                                  | 326966                           | 26.7                             | 0.5                               | 1.2                              | 0.0151                | 26.7                       |                    |                   |
| 7       | Region 6 | 0.0472                                  | 4431                             | -5.7                             | 2.7                               | 1.2                              | 0.0002                | -1.7                       | 0.27               | 0.01              |
| 7       | Region 6 | 0.0471                                  | 4177                             | -7.9                             | 2.5                               | 1.2                              | 0.0002                | -3.9                       | 0.13               | 0.01              |
| 7       | Region 6 | 0.0470                                  | 3377                             | -10.0                            | 2.5                               | 1.2                              | 0.0002                | -6.0                       | 0.23               | 0.01              |
| 7       | Standard | 0.0488                                  | 318134                           | 30.1                             | 0.5                               | 1.2                              | 0.0147                | 30.2                       |                    |                   |
| 7       | Standard | 0.0486                                  | 342831                           | 25.7                             | 0.5                               | 1.2                              | 0.0158                | 25.5                       |                    |                   |
| 7       | Standard | 0.0487                                  | 308832                           | 27.0                             | 0.6                               | 1.2                              | 0.0142                | 27.3                       |                    |                   |
| 7       | Standard | 0.0487                                  | 332213                           | 27.3                             | 0.5                               | 1.2                              | 0.0153                | 27.2                       |                    |                   |
| 8       | Standard | 0.0487                                  | 336473                           | 28.1                             | 0.5                               | 0.7                              | 0.0155                | 28.0                       |                    |                   |
| 8       | Standard | 0.0486                                  | 341332                           | 27.1                             | 0.6                               | 0.7                              | 0.0157                | 26.9                       |                    |                   |
| 8       | Standard | 0.0487                                  | 349612                           | 27.8                             | 0.5                               | 0.7                              | 0.0161                | 27.5                       |                    |                   |
| 8       | Region 5 | 0.0491                                  | 3357                             | 36.6                             | 2.4                               | 0.7                              | 0.0002                | 40.6                       | 0.27               | 0.02              |
| 8       | Region 5 | 0.0481                                  | 2992                             | 16.1                             | 2.5                               | 0.7                              | 0.0001                | 20.2                       | 0.25               | 0.02              |
| 8       | Region 5 | 0.0478                                  | 4908                             | 8.7                              | 2.0                               | 0.7                              | 0.0002                | 12.7                       | 0.13               | 0.01              |
| 8       | Standard | 0.0486                                  | 342644                           | 25.7                             | 0.5                               | 0.7                              | 0.0158                | 25.5                       |                    |                   |
| 8       | Standard | 0.0486                                  | 339981                           | 26.9                             | 0.5                               | 0.7                              | 0.0157                | 26.7                       |                    |                   |
| 8       | Standard | 0.0487                                  | 335867                           | 27.5                             | 0.5                               | 0.7                              | 0.0155                | 27.4                       |                    |                   |
| 8       | Region 6 | 0.0473                                  | 1414                             | -2.3                             | 4.1                               | 0.7                              | 0.0001                | 1.8                        | 0.71               | 0.03              |
| 8       | Region 6 | 0.0481                                  | 941                              | 14.7                             | 5.7                               | 0.7                              | 0.0000                | 18.8                       | 0.91               | 0.09              |
| 8       | Region 5 | 0.0477                                  | 7657                             | 6.0                              | 1.9                               | 0.7                              | 0.0004                | 10.0                       | 0.10               | 0.00              |
| 8       | Region 5 | 0.0478                                  | 8010                             | 7.8                              | 1.5                               | 0.7                              | 0.0004                | 11.9                       | 0.12               | 0.00              |
| 8       | Region 5 | 0.0478                                  | 4595                             | 7.9                              | 2.1                               | 0.7                              | 0.0002                | 11.9                       | 0.11               | 0.00              |
| 8       | Standard | 0.0486                                  | 307018                           | 26.8                             | 0.5                               | 0.7                              | 0.0142                | 27.1                       |                    |                   |
| 8       | Standard | 0.0487                                  | 299312                           | 27.9                             | 0.6                               | 0.7                              | 0.0138                | 28.3                       |                    |                   |
| 8       | Standard | 0.0486                                  | 300101                           | 27.1                             | 0.5                               | 0.7                              | 0.0138                | 27.5                       |                    |                   |
| 9       | Standard | 0.0457                                  | 183497                           | 26.3                             | 0.7                               | 1.5                              | 0.0135                | 26.3                       |                    |                   |
| 9       | Standard | 0.0458                                  | 188289                           | 27.6                             | 0.7                               | 1.5                              | 0.0138                | 27.4                       |                    |                   |
| 9       | Standard | 0.0458                                  | 183769                           | 28.9                             | 0.8                               | 1.5                              | 0.0135                | 28.8                       |                    |                   |
| 9       | Standard | 0.0458                                  | 170046                           | 28.4                             | 0.8                               | 1.5                              | 0.0125                | 28.6                       |                    |                   |
| 9       | Standard | 0.0458                                  | 170012                           | 28.0                             | 0.8                               | 1.5                              | 0.0125                | 28.2                       |                    |                   |
| 9       | Standard | 0.0458                                  | 170597                           | 28.3                             | 0.8                               | 1.5                              | 0.0125                | 28.5                       |                    |                   |
| 9       | Region 5 | 0.0446                                  | 2898                             | 2.8                              | 2.0                               | 1.5                              | 0.0002                | 6.1                        |                    |                   |
| 9       | Region 5 | 0.0440                                  | 3736                             | -11.1                            | 1.7                               | 1.5                              | 0.0003                | -7.8                       |                    |                   |
| 9       | Region 5 | 0.0444                                  | 3496                             | -2.9                             | 1.8                               | 1.5                              | 0.0003                | 0.4                        |                    |                   |
| 9       | Region 5 | 0.0436                                  | 2519                             | -19.9                            | 2.1                               | 1.5                              | 0.0002                | -16.6                      |                    |                   |
| 9       | Region 5 | 0.0444                                  | 2959                             | -2.1                             | 1.9                               | 1.5                              | 0.0002                | 1.2                        |                    |                   |
| 9       | OM       | 0.0442                                  | 10356                            | -7.5                             | 1.7                               | 1.5                              | 0.0008                | -4.3                       |                    |                   |
| 9       | Standard | 0.0457                                  | 183482                           | 25.3                             | 0.8                               | 1.5                              | 0.0135                | 25.2                       |                    |                   |
| 9       | Standard | 0.0456                                  | 182760                           | 24.8                             | 0.8                               | 1.5                              | 0.0134                | 24.7                       |                    |                   |
| 10      | Standard | 0.0456                                  | 671077                           | 27.3                             | 0.5                               | 1.1                              | 0.0217                | 27.6                       |                    |                   |
| 10      | Standard | 0.0456                                  | 647321                           | 27.5                             | 0.5                               | 1.1                              | 0.0210                | 28.0                       |                    |                   |
| 10      | Standard | 0.0456                                  | 659001                           | 27.8                             | 0.4                               | 1.1                              | 0.0213                | 28.2                       |                    |                   |
| 10      | OM       | 0.0433                                  | 7074                             | -22.2                            | 1.8                               | 1.1                              | 0.0002                | -16.4                      |                    |                   |
| 10      | Standard | 0.0456                                  | 840993                           | 28.5                             | 0.4                               | 1.1                              | 0.0273                | 27.3                       |                    |                   |
| 10      | Standard | 0.0456                                  | 844027                           | 27.9                             | 0.4                               | 1.1                              | 0.0274                | 26.8                       |                    |                   |
| 10      | Standard | 0.0456                                  | 853668                           | 28.1                             | 0.4                               | 1.1                              | 0.0277                | 26.9                       |                    |                   |
| 10      | OM       | 0.0437                                  | 5651                             | -13.7                            | 1.9                               | 1.1                              | 0.0002                | -7.9                       |                    |                   |
| 10      | Standard | 0.0455                                  | 615024                           | 26.1                             | 0.5                               | 1.1                              | 0.0199                | 26.9                       |                    |                   |
| 10      | Standard | 0.0455                                  | 617301                           | 26.3                             | 0.5                               | 1.1                              | 0.0200                | 27.0                       |                    |                   |
| 10      | Standard | 0.0455                                  | 613173                           | 25.3                             | 0.5                               | 1.1                              | 0.0198                | 26.1                       |                    |                   |
| 11      | Standard | 0.0457                                  | 327403                           | 27.1                             | 0.6                               | 1.9                              | 0.0241                | 26.8                       |                    |                   |
| 11      | Standard | 0.0456                                  | 329220                           | 26.5                             | 0.6                               | 1.9                              | 0.0243                | 26.1                       |                    |                   |
| 11      | Standard | 0.0458                                  | 333370                           | 30.7                             | 0.6                               | 1.9                              | 0.0246                | 30.2                       |                    |                   |
| 11      | Standard | 0.0458                                  | 342374                           | 30.8                             | 0.6                               | 1.9                              | 0.0252                | 30.2                       |                    |                   |
| 11      | Standard | 0.0456                                  | 274765                           | 25.3                             | 0.6                               | 1.9                              | 0.0202                | 26.0                       |                    |                   |
| 11      | Standard | 0.0456                                  | 293003                           | 25.6                             | 0.6                               | 1.9                              | 0.0216                | 25.9                       |                    |                   |
| 11      | Standard | 0.0457                                  | 340654                           | 27.9                             | 0.6                               | 1.9                              | 0.0251                | 27.2                       |                    |                   |
| 11      | Standard | 0.0457                                  | 343648                           | 28.0                             | 0.6                               | 1.9                              | 0.0253                | 27.3                       |                    |                   |
| 11      | OM       | 0.0438                                  | 14347                            | -15.4                            | 1.4                               | 1.9                              | 0.0010                | -9.8                       |                    |                   |
| 11      | OM       | 0.0439                                  | 20147                            | -11.3                            | 1.2                               | 1.9                              | 0.0015                | -5.8                       |                    |                   |
| 11      | OM       | 0.0439                                  | 28954                            | -13.0                            | 1.0                               | 1.9                              | 0.0021                | -7.7                       |                    |                   |
| 11      | OM       | 0.0438                                  | 21238                            | -13.8                            | 1.1                               | 1.9                              | 0.0015                | -8.4                       |                    |                   |
| 11      | OM       | 0.0445                                  | 28243                            | 1.5                              | 1.1                               | 1.9                              | 0.0021                | 6.8                        |                    |                   |
| 11      | OM       | 0.0440                                  | 21716                            | -9.4                             | 1.2                               | 1.9                              | 0.0016                | -4.0                       |                    |                   |
| 11      | Standard | 0.0456                                  | 285293                           | 26.4                             | 0.6                               | 1.9                              | 0.0210                | 26.8                       |                    |                   |
| 11      | Standard | 0.0457                                  | 286855                           | 26.7                             | 0.6                               | 1.9                              | 0.0211                | 27.1                       |                    |                   |
| 11      | Standard | 0.0456                                  | 272591                           | 26.0                             | 0.7                               | 1.9                              | 0.0200                | 26.7                       |                    |                   |
| 11      | Standard | 0.0456                                  | 275771                           | 25.4                             | 0.7                               | 1.9                              | 0.0203                | 26.1                       |                    |                   |
| 12      | Standard | 0.0458                                  | 248382                           | 27.1                             | 0.7                               | 1.8                              | 0.0183                | 27.3                       |                    |                   |

| Session | Sample*  | $^{34}\text{S}/^{32}\text{S}^{\dagger}$ | $^{32}\text{S}$ cps <sup>†</sup> | $\delta^{34}\text{S}^{\text{‰}}$ | $\sigma_{\text{int}}^{\text{‰}}$ | $\Sigma_{\text{IF}}^{\text{‰}}$ | $K_{\text{cor}}^{**}$ | $\delta^{34}\text{S}^{+\text{‰}}$ | Si/C <sup>++</sup> | O/C <sup>++</sup> |
|---------|----------|-----------------------------------------|----------------------------------|----------------------------------|----------------------------------|---------------------------------|-----------------------|-----------------------------------|--------------------|-------------------|
| 12      | Standard | 0.0457                                  | 242779                           | 26.2                             | 0.7                              | 1.8                             | 0.0178                | 26.5                              |                    |                   |
| 12      | Standard | 0.0457                                  | 246996                           | 25.7                             | 0.7                              | 1.8                             | 0.0181                | 25.9                              |                    |                   |
| 12      | Standard | 0.0457                                  | 248168                           | 26.0                             | 0.7                              | 1.8                             | 0.0182                | 26.2                              |                    |                   |
| 12      | Standard | 0.0459                                  | 270288                           | 30.0                             | 0.6                              | 1.8                             | 0.0199                | 29.8                              |                    |                   |
| 12      | Standard | 0.0459                                  | 274166                           | 30.3                             | 0.6                              | 1.8                             | 0.0202                | 29.9                              |                    |                   |
| 12      | OM       | 0.0442                                  | 9441                             | -8.1                             | 1.7                              | 1.8                             | 0.0007                | -3.4                              |                    |                   |
| 12      | OM       | 0.0441                                  | 10664                            | -10.0                            | 1.6                              | 1.8                             | 0.0008                | -5.3                              |                    |                   |
| 12      | OM       | 0.0443                                  | 10806                            | -5.3                             | 1.6                              | 1.8                             | 0.0008                | -0.7                              |                    |                   |
| 12      | OM       | 0.0441                                  | 17024                            | -10.5                            | 1.3                              | 1.8                             | 0.0012                | -5.9                              |                    |                   |
| 12      | OM       | 0.0438                                  | 8555                             | -16.0                            | 1.9                              | 1.8                             | 0.0006                | -11.3                             |                    |                   |
| 12      | Standard | 0.0457                                  | 261509                           | 25.4                             | 0.6                              | 1.8                             | 0.0192                | 25.3                              |                    |                   |
| 12      | Standard | 0.0457                                  | 260870                           | 26.2                             | 0.6                              | 1.8                             | 0.0192                | 26.2                              |                    |                   |
| 12      | Standard | 0.0458                                  | 263860                           | 28.3                             | 0.6                              | 1.8                             | 0.0194                | 28.2                              |                    |                   |
| 12      | Standard | 0.0458                                  | 267011                           | 26.8                             | 0.6                              | 1.8                             | 0.0196                | 26.7                              |                    |                   |
| 13      | Standard | 0.0457                                  | 193992                           | 25.8                             | 0.8                              | 1.5                             | 0.0142                | 27.1                              |                    |                   |
| 13      | Standard | 0.0457                                  | 187998                           | 24.8                             | 0.7                              | 1.5                             | 0.0138                | 26.3                              |                    |                   |
| 13      | Standard | 0.0458                                  | 231167                           | 28.1                             | 0.7                              | 1.5                             | 0.0170                | 28.7                              |                    |                   |
| 13      | Standard | 0.0458                                  | 239232                           | 27.8                             | 0.7                              | 1.5                             | 0.0176                | 28.2                              |                    |                   |
| 13      | OM       | 0.0452                                  | 460850                           | 13.2                             | 0.3                              | 1.5                             | 0.0341                | 9.5                               |                    |                   |
| 13      | OM       | 0.0456                                  | 587171                           | 22.5                             | 0.2                              | 1.5                             | 0.0437                | 16.3                              |                    |                   |
| 13      | OM       | 0.0438                                  | 10412                            | -18.2                            | 1.6                              | 1.5                             | 0.0008                | -13.5                             |                    |                   |
| 13      | OM       | 0.0439                                  | 11573                            | -15.2                            | 1.6                              | 1.5                             | 0.0008                | -10.5                             |                    |                   |
| 13      | OM       | 0.0457                                  | 629673                           | 24.7                             | 0.2                              | 1.5                             | 0.0469                | 17.6                              |                    |                   |
| 13      | Standard | 0.0458                                  | 204420                           | 26.9                             | 0.7                              | 1.5                             | 0.0150                | 28.1                              |                    |                   |
| 13      | Standard | 0.0458                                  | 203117                           | 28.3                             | 0.8                              | 1.5                             | 0.0149                | 29.4                              |                    |                   |
| 13      | Standard | 0.0459                                  | 239531                           | 29.1                             | 0.7                              | 1.5                             | 0.0176                | 29.6                              |                    |                   |
| 13      | Standard | 0.0459                                  | 234018                           | 29.3                             | 0.7                              | 1.5                             | 0.0172                | 29.9                              |                    |                   |
| 14      | Standard | 0.0459                                  | 744371                           | 29.2                             | 0.4                              | 1.9                             | 0.0182                | 28.6                              |                    |                   |
| 14      | Standard | 0.0459                                  | 734279                           | 29.1                             | 0.4                              | 1.5                             | 0.0180                | 28.5                              |                    |                   |
| 14      | Standard | 0.0458                                  | 670243                           | 26.5                             | 0.4                              | 1.5                             | 0.0164                | 26.3                              |                    |                   |
| 14      | Standard | 0.0459                                  | 668646                           | 27.9                             | 0.4                              | 1.5                             | 0.0164                | 27.8                              |                    |                   |
| 14      | Standard | 0.0458                                  | 635653                           | 26.2                             | 0.4                              | 1.5                             | 0.0155                | 26.3                              |                    |                   |
| 14      | Standard | 0.0458                                  | 639004                           | 25.7                             | 0.4                              | 1.5                             | 0.0156                | 25.8                              |                    |                   |
| 14      | Standard | 0.0458                                  | 631126                           | 27.1                             | 0.4                              | 1.5                             | 0.0154                | 27.2                              |                    |                   |
| 14      | Standard | 0.0458                                  | 641810                           | 25.8                             | 0.4                              | 1.5                             | 0.0157                | 25.8                              |                    |                   |
| 14      | SBB      | 0.0436                                  | 276573                           | -21.9                            | 0.4                              | 1.5                             | 0.0067                | -19.5                             |                    |                   |
| 14      | SBB      | 0.0437                                  | 296009                           | -21.5                            | 0.4                              | 1.5                             | 0.0072                | -19.2                             |                    |                   |
| 14      | SBB      | 0.0431                                  | 245317                           | -34.1                            | 0.5                              | 1.5                             | 0.0060                | -31.5                             |                    |                   |
| 14      | SBB      | 0.0430                                  | 311988                           | -36.5                            | 0.5                              | 1.5                             | 0.0076                | -34.3                             |                    |                   |
| 14      | SBB      | 0.0433                                  | 229615                           | -30.1                            | 0.6                              | 1.5                             | 0.0056                | -27.4                             |                    |                   |
| 14      | SBB      | 0.0433                                  | 247002                           | -29.6                            | 0.6                              | 1.5                             | 0.0060                | -27.0                             |                    |                   |
| 14      | SBB      | 0.0436                                  | 326854                           | -22.1                            | 0.5                              | 1.5                             | 0.0080                | -20.0                             |                    |                   |
| 14      | SBB      | 0.0436                                  | 301872                           | -23.1                            | 0.5                              | 1.5                             | 0.0074                | -20.9                             |                    |                   |
| 14      | SBB      | 0.0439                                  | 403861                           | -17.0                            | 0.5                              | 1.5                             | 0.0099                | -15.3                             |                    |                   |
| 14      | SBB      | 0.0438                                  | 364072                           | -18.4                            | 0.5                              | 1.5                             | 0.0089                | -16.5                             |                    |                   |
| 14      | SBB      | 0.0433                                  | 167487                           | -30.3                            | 0.6                              | 1.5                             | 0.0041                | -27.3                             |                    |                   |
| 14      | SBB      | 0.0432                                  | 153104                           | -31.5                            | 0.6                              | 1.5                             | 0.0037                | -28.3                             |                    |                   |
| 14      | SBB      | 0.0434                                  | 186001                           | -27.0                            | 0.6                              | 1.5                             | 0.0045                | -24.1                             |                    |                   |
| 14      | SBB      | 0.0433                                  | 185739                           | -28.5                            | 0.7                              | 1.5                             | 0.0045                | -25.6                             |                    |                   |
| 14      | Standard | 0.0458                                  | 607838                           | 26.3                             | 0.4                              | 1.5                             | 0.0149                | 26.5                              |                    |                   |
| 14      | Standard | 0.0458                                  | 589074                           | 26.0                             | 0.5                              | 1.5                             | 0.0144                | 26.3                              |                    |                   |
| 14      | GHA      | 0.0455                                  | 599595                           | 19.1                             | 0.8                              | 1.5                             | 0.0147                | 19.4                              |                    |                   |
| 14      | GHA      | 0.0455                                  | 617689                           | 20.6                             | 0.5                              | 1.5                             | 0.0151                | 20.8                              |                    |                   |
| 14      | GHA      | 0.0453                                  | 752195                           | 14.6                             | 0.4                              | 1.5                             | 0.0184                | 14.0                              |                    |                   |
| 14      | GHA      | 0.0453                                  | 766552                           | 15.3                             | 0.8                              | 1.5                             | 0.0188                | 14.6                              |                    |                   |
| 14      | GHA      | 0.0454                                  | 627992                           | 16.3                             | 0.4                              | 1.5                             | 0.0154                | 16.5                              |                    |                   |
| 14      | GHA      | 0.0454                                  | 661269                           | 17.5                             | 0.4                              | 1.5                             | 0.0162                | 17.4                              |                    |                   |
| 14      | GHA      | 0.0455                                  | 819873                           | 19.0                             | 0.4                              | 1.5                             | 0.0201                | 18.0                              |                    |                   |
| 14      | GHA      | 0.0455                                  | 826526                           | 19.9                             | 0.4                              | 1.5                             | 0.0203                | 18.7                              |                    |                   |
| 14      | GHA      | 0.0453                                  | 711850                           | 15.4                             | 0.4                              | 1.5                             | 0.0174                | 15.0                              |                    |                   |
| 14      | GHA      | 0.0453                                  | 723731                           | 15.8                             | 0.4                              | 1.5                             | 0.0177                | 15.4                              |                    |                   |
| 14      | GHA      | 0.0453                                  | 602270                           | 15.5                             | 0.5                              | 1.5                             | 0.0147                | 15.8                              |                    |                   |
| 14      | GHA      | 0.0453                                  | 598057                           | 15.8                             | 0.5                              | 1.5                             | 0.0146                | 16.1                              |                    |                   |
| 14      | GHA      | 0.0454                                  | 596846                           | 17.2                             | 0.5                              | 1.5                             | 0.0146                | 17.6                              |                    |                   |
| 14      | GHA      | 0.0454                                  | 632604                           | 17.4                             | 0.4                              | 1.5                             | 0.0155                | 17.5                              |                    |                   |
| 14      | WIL      | 0.0446                                  | 43503                            | 0.3                              | 1.1                              | 1.5                             | 0.0011                | 4.1                               |                    |                   |
| 14      | WIL      | 0.0447                                  | 44051                            | 1.1                              | 1.1                              | 1.5                             | 0.0011                | 4.9                               |                    |                   |
| 14      | WIL      | 0.0449                                  | 36904                            | 6.2                              | 1.2                              | 1.5                             | 0.0009                | 10.0                              |                    |                   |
| 14      | WIL      | 0.0451                                  | 30187                            | 9.7                              | 1.4                              | 1.5                             | 0.0007                | 13.6                              |                    |                   |
| 14      | WIL      | 0.0449                                  | 27694                            | 6.2                              | 1.4                              | 1.5                             | 0.0007                | 10.1                              |                    |                   |
| 14      | WIL      | 0.0448                                  | 25006                            | 5.2                              | 1.5                              | 1.5                             | 0.0006                | 9.1                               |                    |                   |
| 14      | WIL      | 0.0448                                  | 47893                            | 3.5                              | 1.1                              | 1.5                             | 0.0012                | 7.2                               |                    |                   |

| Session | Sample*    | $^{34}\text{S}/^{32}\text{S}^{\dagger}$ | $^{32}\text{S}$ cps <sup>†</sup> | $\delta^{34}\text{S}^{\ddagger}$ | $\sigma_{\text{int}}^{\text{§}}$ | $\Sigma_{\text{IF}}^{\parallel}$ | $K_{\text{cor}}^{**}$ | $\delta^{34}\text{S}^{\text{††}}$ | Si/C <sup>††</sup> | O/C <sup>††</sup> |
|---------|------------|-----------------------------------------|----------------------------------|----------------------------------|----------------------------------|----------------------------------|-----------------------|-----------------------------------|--------------------|-------------------|
| 14      | WIL        | 0.0447                                  | 48944                            | 2.7                              | 1.1                              | 1.5                              | 0.0012                | 6.4                               |                    |                   |
| 14      | WIL        | 0.0452                                  | 57327                            | 12.1                             | 1.0                              | 1.5                              | 0.0014                | 15.8                              |                    |                   |
| 14      | WIL        | 0.0451                                  | 60850                            | 10.5                             | 0.9                              | 1.5                              | 0.0015                | 14.2                              |                    |                   |
| 14      | WIL        | 0.0451                                  | 62556                            | 10.7                             | 0.9                              | 1.5                              | 0.0015                | 14.4                              |                    |                   |
| 14      | Standard   | 0.0458                                  | 573859                           | 25.4                             | 0.5                              | 1.5                              | 0.0140                | 25.8                              |                    |                   |
| 14      | Standard   | 0.0458                                  | 563333                           | 26.0                             | 0.5                              | 1.5                              | 0.0138                | 26.5                              |                    |                   |
| 14      | Standard   | 0.0458                                  | 645058                           | 27.2                             | 0.4                              | 1.5                              | 0.0158                | 27.2                              |                    |                   |
| 14      | Standard   | 0.0458                                  | 653409                           | 27.0                             | 0.5                              | 1.5                              | 0.0160                | 26.9                              |                    |                   |
| 14      | Standard   | 0.0460                                  | 655143                           | 29.7                             | 0.4                              | 1.5                              | 0.0160                | 29.6                              |                    |                   |
| 14      | Standard   | 0.0460                                  | 658777                           | 30.1                             | 0.5                              | 1.5                              | 0.0161                | 30.0                              |                    |                   |
| 15      | Pyrite Std | 0.0469                                  | 281560                           | 9.6                              | 0.9                              | 1.0                              | 0.0376                | 9.3                               |                    |                   |
| 15      | Pyrite Std | 0.047                                   | 281820                           | 10.3                             | 0.9                              | 1.0                              | 0.0376                | 10.0                              |                    |                   |
| 15      | Pyrite Std | 0.047                                   | 281579                           | 10.4                             | 0.9                              | 1.0                              | 0.0376                | 10.1                              |                    |                   |
| 15      | Pyrite 1   | 0.0462                                  | 230784                           | -7.1                             | 1.0                              | 1.0                              | 0.0308                | -5.3                              |                    |                   |
| 15      | Pyrite 1   | 0.0462                                  | 231057                           | -6.8                             | 1.0                              | 1.0                              | 0.0308                | -5.0                              |                    |                   |
| 15      | Pyrite 1   | 0.0462                                  | 230275                           | -7.2                             | 1.0                              | 1.0                              | 0.0307                | -5.4                              |                    |                   |
| 15      | Pyrite 2   | 0.0461                                  | 226551                           | -8.9                             | 1.0                              | 1.0                              | 0.0302                | -7.0                              |                    |                   |
| 15      | Pyrite 2   | 0.0461                                  | 226027                           | -7.7                             | 1.0                              | 1.0                              | 0.0302                | -5.8                              |                    |                   |
| 15      | Pyrite 2   | 0.0461                                  | 224265                           | -8.9                             | 0.9                              | 1.0                              | 0.0299                | -6.9                              |                    |                   |
| 15      | Pyrite 3   | 0.0461                                  | 230217                           | -8.1                             | 0.9                              | 1.0                              | 0.0307                | -6.3                              |                    |                   |
| 15      | Pyrite 3   | 0.0462                                  | 230151                           | -7.5                             | 1.0                              | 1.0                              | 0.0307                | -5.8                              |                    |                   |
| 15      | Pyrite 3   | 0.0461                                  | 231956                           | -7.7                             | 1.0                              | 1.0                              | 0.031                 | -6.0                              |                    |                   |
| 15      | Pyrite Std | 0.0469                                  | 277813                           | 8.9                              | 0.9                              | 1.0                              | 0.0371                | 8.8                               |                    |                   |
| 15      | Pyrite Std | 0.0469                                  | 278456                           | 8.0                              | 0.9                              | 1.0                              | 0.0372                | 7.9                               |                    |                   |
| 15      | Pyrite Std | 0.0469                                  | 279633                           | 8.2                              | 0.9                              | 1.0                              | 0.0373                | 8.0                               |                    |                   |

\*Standard, kerogen isolated from Monterey Formation; Region x, in situ measurements from stromatolite thin sections; OM, kerogen extracted from Strelley Pool stromatolite; SBB, protokerogen from recent Santa Barbara Basin sediments; GHA, kerogen from Ghareb Limestone; WIL, kerogen from the Wilcox group; OD1, sulfide minerals from ore deposit; OD2, sulfide minerals from ore deposit; Pyrite Std, pyrite standard with a  $\delta^{34}\text{S}_{\text{CDT}}$  of 9‰; Pyrite x, pyrite crystals measured in situ from Strelley Pool stromatolite thin sections.

<sup>†</sup>Raw isotope ratio corrected only for detector dead-time.

<sup>‡</sup> $^{32}\text{S}$  ion current expressed in counts per second.

<sup>§</sup>Sulfur isotope composition of kerogen corrected for instrumental mass fractionation and expressed in ‰ relative to the V-CDT standard.

<sup>¶</sup>Internal error ( $1\sigma$ ).

<sup>||</sup>Standard deviation ( $1\sigma$ ) for the linear regression used to correct for the instrumental mass fractionation during each session.

<sup>\*\*</sup>Corrected  $^{32}\text{S}^-/\text{C}_s^+$  ratio used for QSA correction of  $^{34}\text{S}/^{32}\text{S}$  ratios (see SOM).

<sup>††</sup>Sulfur isotope composition of kerogen corrected for instrumental mass fractionation and QSA, and expressed in ‰ relative to the V-CDT standard.

<sup>†††</sup>Elemental ratios are not corrected for instrumental mass fractionation. Thus, only data from the same session can be compared. During sessions 1 to 5, oxygen was measured as  $^{16}\text{O}$ ; from session 6 to 8, it was measured as  $^{18}\text{O}$ .
